# Supplementary material for: Operating interfaces to synthesize L10-FePt@Bi-rich nanoparticles by modifying the heating process
Source: Royal Society of Chemistry journal article supplement (doi:10.1039/d2nr01493a), 2022-01-01
Supplement: d2nr01493a1.pdf [file d2nr01493a1.pdf]

## Supplementary Information

### Operating interfaces to synthesize $L1_0$ -FePt@Bi-rich nanoparticles by modifying the heating process

Ling Chang<sup>a,b</sup>, Chun Wu<sup>c,d</sup>, Qunshou Wang<sup>c</sup>, Ting Li<sup>c</sup>, Dong Zhao<sup>c</sup>, Kai Wang<sup>a</sup>, Qiang Wang<sup>\*a</sup>, and Wenli Pei<sup>\*c</sup>

<sup>a</sup> Key Laboratory of Electromagnetic Processing of Materials (Ministry of Education), Northeastern University, Shenyang 110819, China.

<sup>b</sup> School of Metallurgy, Northeastern University, Shenyang 110819, China.

<sup>c</sup> Key Laboratory of Anisotropy and Texture of Materials (Ministry of Education), School of Materials Science and Engineering, Northeastern University, Shenyang 110819, China.

<sup>d</sup> School of Materials Science and Engineering, Liaoning Technical University, Fuxin, 123000, China

\* Corresponding author. E-mail address: E-mail: [peiwli@atm.neu.edu.cn](mailto:peiwli@atm.neu.edu.cn) (W. Pei), E-mail: [wangq@mail.neu.edu.cn](mailto:wangq@mail.neu.edu.cn) (Q. Wang).

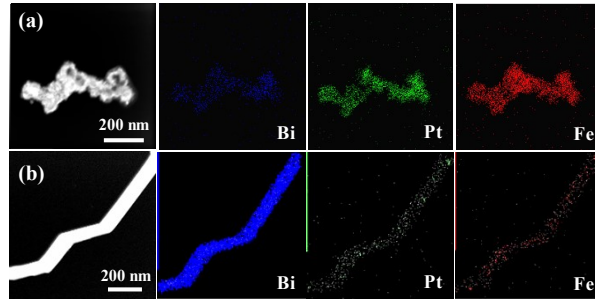

**Fig. S1** Elemental mapping of  $L1_0$ -FePtBi NPs synthesized at a heating rate of  $2^\circ\text{C}/\text{min}$ .

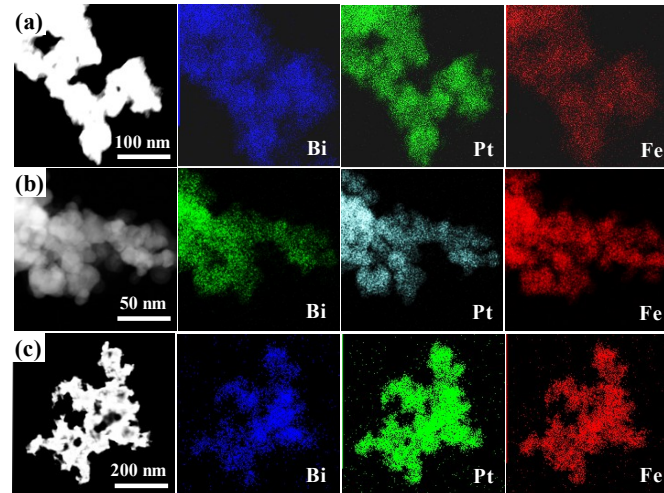

**Fig. S2** Elemental mapping of  $L1_0$ -FePtBi NPs synthesized at a heating rate of (a)  $6^\circ\text{C}/\text{min}$ , (b)  $10^\circ\text{C}/\text{min}$ , and (c)  $10\&2^\circ\text{C}/\text{min}$ .

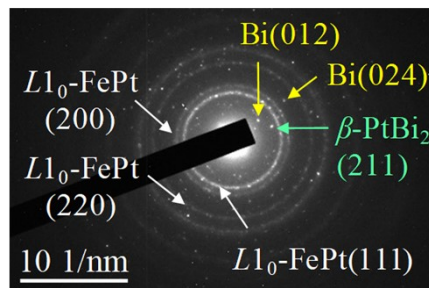

**Fig. S3** SAED patterns of the synthesized FePtBi NPs at a heating rate of  $10^\circ\text{C}/\text{min}$ .

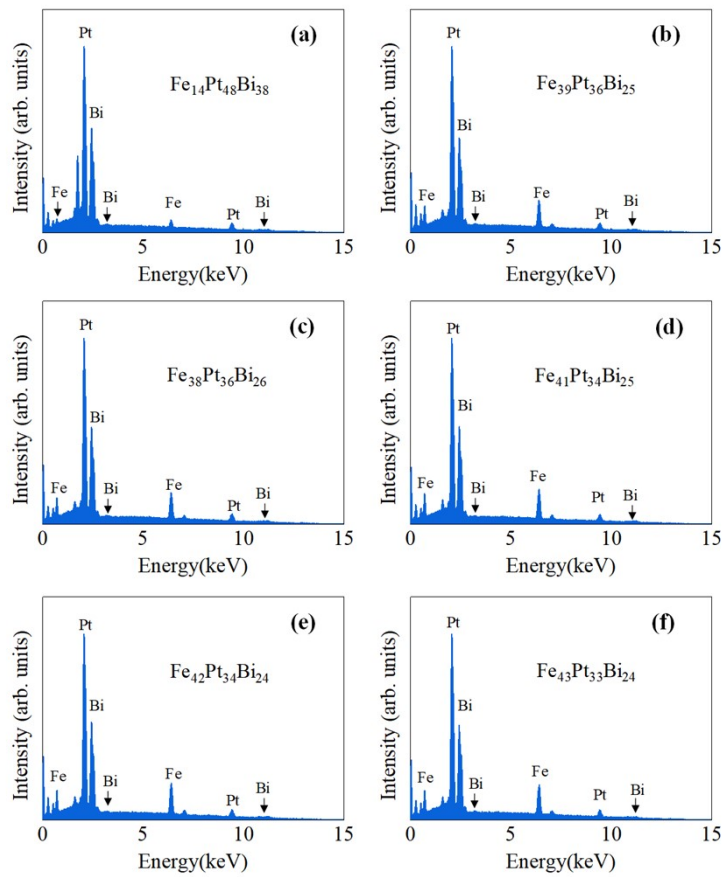

**Fig. S4** EDS spectrums of the synthesized  $L1_0$ -FePt/Bi-rich NPs at 160°C, 230°C, 310°C, and 360°C holding for 0 h, 1 h, and 3 h
